# Supplementary material for: MiR-34a Expression Has an Effect for Lower Risk of Metastasis and Associates with Expression Patterns Predicting Clinical Outcome in Breast Cancer
Source: PLoS One. 2011 Nov 10;6(11):e26122. doi: 10.1371/journal.pone.0026122 (PMC3213093; doi:10.1371/journal.pone.0026122)
Supplement: Table S3 — Genomatix ModelInspector results and miR-34a targets. The file consists of 5 sheets. The MatInspector table lists the transcription factor matrices (Matrix Family), the enrichment p-value for potential binding on the promoters of the differentially expressed genes (P-value), the overall number of matches (No. of matches) and the number of promoters with predicted consensus (No. of sequences). The other tables report the differentially expressed genes that are targeted by miR-34a (mir34a table), the miR-34a targets under the control of p53 (mir34a+p53), MAZ (mir34a+MAZ) or both (mir34a+MAZ+p53). The columns of these tables are as in table S1. (XLS) [file pone.0026122.s004.xls]

## Sheet: mir34a+MAZ+P53
GeneName	GeneSymbol	EntrezGeneID	logFC	AveExpr	t	P.Value	miR34a_target	MAZ_target	p53_target
protein phosphatase 3 (formerly 2B), regulatory subunit B, alpha isoform	PPP3R1	5534	0.406467	7.47997	2.79254	0.00670092	yes	V$MAZ.01	V$P53F
syntaxin 16	STX16	8675	0.367246	8.52286	2.648	0.00995145	yes	V$MAZ.01	V$P53F
transmembrane protein 41A	TMEM41A	90407	0.34669	6.23186	2.6877	0.00893916	yes	V$MAZ.01	V$P53F
tubulin, gamma 1	TUBG1	7283	0.340084	6.3956	2.87717	0.00528303	yes	V$MAZ.01	V$P53F
BTB (POZ) domain containing 3	BTBD3	22903	0.301977	6.12387	2.80557	0.006462	yes	V$MAZ.01	V$P53F
chromosome 21 open reading frame 59	C21orf59	56683	0.294655	5.50543	2.74653	0.00761096	yes	V$MAZ.01	V$P53F
G protein pathway suppressor 2	GPS2	2874	0.227188	7.57581	2.65079	0.00987689	yes	V$MAZ.01	V$P53F
SUMO1/sentrin/SMT3 specific peptidase 2	SENP2	59343	0.211398	6.58336	2.68273	0.00906049	yes	V$MAZ.01	V$P53F
polymerase (DNA directed), gamma	POLG	5428	0.210318	6.40718	2.66654	0.00946644	yes	V$MAZ.01	V$P53F
G patch domain containing 8	GPATCH8	23131	0.169387	5.03542	3.40209	0.0010973	yes	V$MAZ.01	V$P53F
centrosomal protein 250kDa	CEP250	11190	0.152993	5.13719	2.86445	0.00547675	yes	V$MAZ.01	V$P53F
IMP (inosine monophosphate) dehydrogenase 1	IMPDH1	3614	0.146538	4.89791	3.10946	0.00268889	yes	V$MAZ.01	V$P53F
WD and tetratricopeptide repeats 1	WDTC1	23038	0.138237	4.78895	2.64915	0.00992074	yes	V$MAZ.01	V$P53F
collagen, type XXI, alpha 1	COL21A1	81578	0.131492	4.6513	2.92411	0.0046214	yes	V$MAZ.01	V$P53F
coiled-coil domain containing 57	CCDC57	284001	0.129724	5.035	3.03887	0.00331286	yes	V$MAZ.01	V$P53F
protein tyrosine phosphatase, non-receptor type 18 (brain-derived)	PTPN18	26469	0.116391	4.88462	2.78387	0.00686443	yes	V$MAZ.01	V$P53F
DBF4 homolog B (S. cerevisiae)	DBF4B	80174	0.110558	4.79797	2.70962	0.00842133	yes	V$MAZ.01	V$P53F
fms-related tyrosine kinase 4	FLT4	2324	0.0826289	4.69379	3.02585	0.00344182	yes	V$MAZ.01	V$P53F
matrix metallopeptidase 17 (membrane-inserted)	MMP17	4326	0.0639088	4.72815	2.69846	0.00868132	yes	V$MAZ.01	V$P53F
solute carrier family 24 (sodium/potassium/calcium exchanger), member 2	SLC24A2	25769	-0.149121	4.8422	-3.31277	0.00145007	yes	V$MAZ.01	V$P53F
single-minded homolog 2 (Drosophila)	SIM2	6493	-0.183462	4.86165	-2.87726	0.00528165	yes	V$MAZ.01	V$P53F
discs, large homolog 2 (Drosophila)	DLG2	1740	-0.220342	4.98939	-2.69528	0.00875686	yes	V$MAZ.01	V$P53F
ATPase, class I, type 8B, member 2	ATP8B2	57198	-0.243928	5.42083	-3.0203	0.00349818	yes	V$MAZ.01	V$P53F
AKT interacting protein	AKTIP	64400	-0.344746	7.63302	-2.85072	0.0056932	yes	V$MAZ.01	V$P53F
protein tyrosine phosphatase, receptor type, D	PTPRD	5789	-0.387949	5.34549	-3.38336	0.0011638	yes	V$MAZ.01	V$P53F
sprouty-related, EVH1 domain containing 1	SPRED1	161742	-0.522791	9.5045	-3.24979	0.00176023	yes	V$MAZ.01	V$P53F
ectonucleoside triphosphate diphosphohydrolase 1	ENTPD1	953	-0.531196	6.97484	-2.91701	0.00471626	yes	V$MAZ.01	V$P53F
adenosine A2a receptor	ADORA2A	135	-0.636091	6.08577	-2.87667	0.00529045	yes	V$MAZ.01	V$P53F
tumor protein p53 inducible nuclear protein 1	TP53INP1	94241	-0.713435	8.00966	-3.18119	0.00216845	yes	V$MAZ.01	V$P53F

## Sheet: mir34a+p53
GeneName	GeneSymbol	EntrezGeneID	logFC	AveExpr	t	P.Value	miR34a_target	MAZ_target	p53_target
DNA fragmentation factor, 45kDa, alpha polypeptide	DFFA	1676	0.338535	6.95068	3.31363	0.00144621	yes	no	V$P53F
hyperpolarization activated cyclic nucleotide-gated potassium channel 3	HCN3	57657	0.307644	5.69009	2.78836	0.00677929	yes	no	V$P53F
zinc finger protein 302	ZNF302	55900	-0.186047	5.06092	-2.88574	0.00515601	yes	no	V$P53F
UDP-N-acetyl-alpha-D-galactosamine:polypeptide N-acetylgalactosaminyltransferase 1 (GalNAc-T1)	GALNT1	2589	-0.371835	6.55504	-3.3007	0.00150523	yes	no	V$P53F

## Sheet: mir34a+MAZ
GeneName	GeneSymbol	EntrezGeneID	logFC	AveExpr	t	P.Value	miR34a_target	MAZ_target	p53_target
neuropilin (NRP) and tolloid (TLL)-like 1	NETO1	81832	-0.0564368	4.69496	-2.97388	0.00400412	yes	V$MAZ.01	no
cell division cycle 40 homolog (S. cerevisiae)	CDC40	51362	-0.289846	7.98805	-3.00809	0.00362512	yes	V$MAZ.01	no
corin, serine peptidase	CORIN	10699	-0.623751	5.32236	-3.86343	0.000242945	yes	V$MAZ.01	no
collagen, type VIII, alpha 2	COL8A2	1296	-0.63273	7.43362	-3.20391	0.00202432	yes	V$MAZ.01	no
neurofilament, heavy polypeptide	NEFH	4744	-0.702956	5.4688	-3.3304	0.00137293	yes	V$MAZ.01	no
RAS-like, family 11, member B	RASL11B	65997	-0.842594	7.31001	-3.16457	0.00227985	yes	V$MAZ.01	no
solute carrier family 12 (sodium/potassium/chloride transporters), member 2	SLC12A2	6558	-0.842614	8.02189	-2.81549	0.0062854	yes	V$MAZ.01	no

## Sheet: mir34a
GeneName	GeneSymbol	EntrezGeneID	logFC	AveExpr	t	P.Value	miR34a_target	MAZ_target	p53_target
protein phosphatase 3 (formerly 2B), regulatory subunit B, alpha isoform	PPP3R1	5534	0.406467	7.47997	2.79254	0.00670092	yes	V$MAZ.01	V$P53F
syntaxin 16	STX16	8675	0.367246	8.52286	2.648	0.00995145	yes	V$MAZ.01	V$P53F
transmembrane protein 41A	TMEM41A	90407	0.34669	6.23186	2.6877	0.00893916	yes	V$MAZ.01	V$P53F
tubulin, gamma 1	TUBG1	7283	0.340084	6.3956	2.87717	0.00528303	yes	V$MAZ.01	V$P53F
DNA fragmentation factor, 45kDa, alpha polypeptide	DFFA	1676	0.338535	6.95068	3.31363	0.00144621	yes	no	V$P53F
hyperpolarization activated cyclic nucleotide-gated potassium channel 3	HCN3	57657	0.307644	5.69009	2.78836	0.00677929	yes	no	V$P53F
BTB (POZ) domain containing 3	BTBD3	22903	0.301977	6.12387	2.80557	0.006462	yes	V$MAZ.01	V$P53F
chromosome 21 open reading frame 59	C21orf59	56683	0.294655	5.50543	2.74653	0.00761096	yes	V$MAZ.01	V$P53F
pyrroline-5-carboxylate reductase family, member 2	PYCR2	29920	0.251371	7.43206	2.65276	0.0098247	yes	no	no
G protein pathway suppressor 2	GPS2	2874	0.227188	7.57581	2.65079	0.00987689	yes	V$MAZ.01	V$P53F
SUMO1/sentrin/SMT3 specific peptidase 2	SENP2	59343	0.211398	6.58336	2.68273	0.00906049	yes	V$MAZ.01	V$P53F
polymerase (DNA directed), gamma	POLG	5428	0.210318	6.40718	2.66654	0.00946644	yes	V$MAZ.01	V$P53F
G patch domain containing 8	GPATCH8	23131	0.169387	5.03542	3.40209	0.0010973	yes	V$MAZ.01	V$P53F
centrosomal protein 250kDa	CEP250	11190	0.152993	5.13719	2.86445	0.00547675	yes	V$MAZ.01	V$P53F
IMP (inosine monophosphate) dehydrogenase 1	IMPDH1	3614	0.146538	4.89791	3.10946	0.00268889	yes	V$MAZ.01	V$P53F
WD and tetratricopeptide repeats 1	WDTC1	23038	0.138237	4.78895	2.64915	0.00992074	yes	V$MAZ.01	V$P53F
collagen, type XXI, alpha 1	COL21A1	81578	0.131492	4.6513	2.92411	0.0046214	yes	V$MAZ.01	V$P53F
coiled-coil domain containing 57	CCDC57	284001	0.129724	5.035	3.03887	0.00331286	yes	V$MAZ.01	V$P53F
protein tyrosine phosphatase, non-receptor type 18 (brain-derived)	PTPN18	26469	0.116391	4.88462	2.78387	0.00686443	yes	V$MAZ.01	V$P53F
DBF4 homolog B (S. cerevisiae)	DBF4B	80174	0.110558	4.79797	2.70962	0.00842133	yes	V$MAZ.01	V$P53F
fms-related tyrosine kinase 4	FLT4	2324	0.0826289	4.69379	3.02585	0.00344182	yes	V$MAZ.01	V$P53F
matrix metallopeptidase 17 (membrane-inserted)	MMP17	4326	0.0639088	4.72815	2.69846	0.00868132	yes	V$MAZ.01	V$P53F
neuropilin (NRP) and tolloid (TLL)-like 1	NETO1	81832	-0.0564368	4.69496	-2.97388	0.00400412	yes	V$MAZ.01	no
solute carrier family 24 (sodium/potassium/calcium exchanger), member 2	SLC24A2	25769	-0.149121	4.8422	-3.31277	0.00145007	yes	V$MAZ.01	V$P53F
single-minded homolog 2 (Drosophila)	SIM2	6493	-0.183462	4.86165	-2.87726	0.00528165	yes	V$MAZ.01	V$P53F
zinc finger protein 302	ZNF302	55900	-0.186047	5.06092	-2.88574	0.00515601	yes	no	V$P53F
discs, large homolog 2 (Drosophila)	DLG2	1740	-0.220342	4.98939	-2.69528	0.00875686	yes	V$MAZ.01	V$P53F
ATPase, class I, type 8B, member 2	ATP8B2	57198	-0.243928	5.42083	-3.0203	0.00349818	yes	V$MAZ.01	V$P53F
cell division cycle 40 homolog (S. cerevisiae)	CDC40	51362	-0.289846	7.98805	-3.00809	0.00362512	yes	V$MAZ.01	no
cell adhesion molecule 2	CADM2	253559	-0.303657	4.834	-3.2027	0.00203176	yes	no	no
AKT interacting protein	AKTIP	64400	-0.344746	7.63302	-2.85072	0.0056932	yes	V$MAZ.01	V$P53F
UDP-N-acetyl-alpha-D-galactosamine:polypeptide N-acetylgalactosaminyltransferase 1 (GalNAc-T1)	GALNT1	2589	-0.371835	6.55504	-3.3007	0.00150523	yes	no	V$P53F
protein tyrosine phosphatase, receptor type, D	PTPRD	5789	-0.387949	5.34549	-3.38336	0.0011638	yes	V$MAZ.01	V$P53F
sprouty-related, EVH1 domain containing 1	SPRED1	161742	-0.522791	9.5045	-3.24979	0.00176023	yes	V$MAZ.01	V$P53F
ectonucleoside triphosphate diphosphohydrolase 1	ENTPD1	953	-0.531196	6.97484	-2.91701	0.00471626	yes	V$MAZ.01	V$P53F
corin, serine peptidase	CORIN	10699	-0.623751	5.32236	-3.86343	0.000242945	yes	V$MAZ.01	no
collagen, type VIII, alpha 2	COL8A2	1296	-0.63273	7.43362	-3.20391	0.00202432	yes	V$MAZ.01	no
adenosine A2a receptor	ADORA2A	135	-0.636091	6.08577	-2.87667	0.00529045	yes	V$MAZ.01	V$P53F
neurofilament, heavy polypeptide	NEFH	4744	-0.702956	5.4688	-3.3304	0.00137293	yes	V$MAZ.01	no
tumor protein p53 inducible nuclear protein 1	TP53INP1	94241	-0.713435	8.00966	-3.18119	0.00216845	yes	V$MAZ.01	V$P53F
RAS-like, family 11, member B	RASL11B	65997	-0.842594	7.31001	-3.16457	0.00227985	yes	V$MAZ.01	no
solute carrier family 12 (sodium/potassium/chloride transporters), member 2	SLC12A2	6558	-0.842614	8.02189	-2.81549	0.0062854	yes	V$MAZ.01	no
Norrie disease (pseudoglioma)	NDP	4693	-1.19234	6.51608	-2.69134	0.00885111	yes	no	no

## Sheet: MatInspector
Matrix Family	p-value	No. of matches	No. of sequences
O$TF2B	2.69e-05	177	112
V$CDEF	3.58e-05	255	155
V$PURA	5.69e-05	154	116
V$AARF	8.12e-05	103	99
V$HDGF	0.000128	23	21
V$MTF1	0.00016	163	127
V$HICF	0.000285	237	170
V$HDBP	0.000321	387	156
V$SIX3	0.000608	55	53
V$CHOP	0.000693	92	86
V$MZF1	0.000776	753	420
V$DLXF	0.00199	801	329
V$WHNF	0.0031	296	199
V$NRF1	0.00387	781	157
V$PAX5	0.00612	570	338
V$STAF	0.00924	469	311
V$E2FF	0.0135	1233	449
O$XCPE	0.0157	523	228
V$EBOX	0.0217	895	397
V$KLFS	0.026	2016	582
O$MTEN	0.0269	485	226
V$CDXF	0.0276	769	395
V$INSM	0.0324	373	261
V$ZF5F	0.0341	469	169
V$PAX9	0.0437	141	117
V$SREB	0.0443	232	187
V$AP2F	0.0461	343	206
V$MYOD	0.0491	695	340
V$MAZF	0.0527	897	343
O$TF3C	0.0599	38	37
V$GFI1	0.0601	364	272
V$YBXF	0.0616	222	183
V$ZFXY	0.0617	233	163
V$HESF	0.0691	677	317
O$TF2D	0.0779	137	120
V$DEAF	0.0869	217	166
V$PLAG	0.098	485	226
V$AHRR	0.104	508	287
V$CREB	0.105	1523	562
V$ATBF	0.107	396	224
V$THAP	0.108	116	111
V$HBOX	0.11	1878	486
V$CIZF	0.128	263	203
V$PAX8	0.131	335	263
V$NKX1	0.151	356	180
V$ZFHX	0.163	577	378
V$CHRE	0.171	152	119
V$HOMF	0.182	3202	617
V$PTF1	0.186	203	170
V$NF1F	0.208	413	282
V$BCL6	0.209	452	311
V$MEF3	0.21	250	211
V$BARB	0.216	258	217
V$DICE	0.223	229	193
V$ETSF	0.224	2043	633
V$YY1F	0.228	726	440
V$CART	0.251	1770	450
V$HOXH	0.255	455	318
V$SATB	0.259	307	177
V$ZBPF	0.273	1982	406
V$NFAT	0.275	917	447
O$YTBP	0.284	600	116
V$IRFF	0.288	872	452
V$AIRE	0.298	150	138
V$HIFF	0.309	406	217
V$HZIP	0.312	86	78
V$FXRE	0.316	161	127
V$PAX1	0.319	77	75
V$XBBF	0.321	595	363
V$HEAT	0.328	893	467
V$GCMF	0.334	292	230
V$SNAP	0.334	519	346
V$NOLF	0.336	401	250
V$CHRF	0.339	309	234
V$PRDF	0.342	408	294
V$NFKB	0.344	674	347
V$BRAC	0.348	278	215
V$MOKF	0.353	513	346
V$HNFP	0.36	89	79
V$HAML	0.365	348	267
V$CEBP	0.37	649	375
V$RBPF	0.37	329	262
V$STAT	0.375	1297	486
V$SALL	0.392	98	79
V$PDX1	0.394	646	295
V$TEAF	0.396	302	248
V$HNF1	0.398	1500	488
V$PAX2	0.41	345	251
V$ZF35	0.435	194	157
V$OVOL	0.465	400	283
V$MEF2	0.474	654	324
V$GLIF	0.478	711	359
V$NKX6	0.485	925	356
V$CSEN	0.502	143	129
V$ZNFP	0.517	207	163
V$DMTF	0.521	165	134
V$GTBX	0.521	68	66
V$PAXH	0.521	420	178
V$BRN5	0.531	1305	433
V$RBP2	0.532	126	120
V$EREF	0.557	429	280
V$GZF1	0.558	172	144
V$CABL	0.564	82	72
V$HMTB	0.573	319	241
V$PAX6	0.585	888	472
V$EGRF	0.587	1797	385
V$ARID	0.609	462	268
O$PTBP	0.634	538	200
V$CTCF	0.634	1198	340
V$PIT1	0.648	530	218
V$PAX3	0.652	238	196
V$SORY	0.658	1730	576
V$RREB	0.666	366	240
V$DMRT	0.668	941	434
V$SF1F	0.68	300	232
V$AP1R	0.706	1046	468
V$BCDF	0.707	686	378
V$LHXF	0.707	2194	443
V$HNF6	0.717	498	293
V$PCBE	0.72	152	138
V$IKRS	0.738	436	310
V$SP1F	0.753	1526	399
V$RXRF	0.78	1538	576
V$PERO	0.781	691	429
V$AP4R	0.784	260	171
V$ABDB	0.797	1567	519
V$NBRE	0.801	169	144
V$P53F	0.812	568	315
V$LEFF	0.831	452	323
V$MYBL	0.831	909	458
V$PRDM	0.84	262	172
V$ZFIA	0.84	113	101
V$BRNF	0.857	2287	484
V$NEUR	0.861	515	342
V$AP1F	0.865	366	216
V$PPAR	0.865	115	98
V$CAAT	0.89	756	433
V$CLOX	0.897	836	413
V$RORA	0.897	569	361
V$NKXH	0.901	1496	511
V$OAZF	0.905	221	143
V$PLZF	0.905	271	206
V$SPZ1	0.905	289	202
V$BTBF	0.906	105	98
V$RP58	0.907	144	123
V$GABF	0.909	311	109
O$INRE	0.912	311	242
V$NRSF	0.914	584	317
V$ZFTR	0.915	274	210
V$E4FF	0.928	208	154
V$BPTF	0.932	141	116
V$PARF	0.934	1286	447
V$GRHL	0.935	313	215
V$NR2F	0.935	1303	563
V$RU49	0.937	186	144
V$GUCE	0.945	12	12
V$FKHD	0.949	1828	535
V$CP2F	0.951	468	305
V$BNCF	0.952	130	111
V$RUSH	0.954	749	407
V$HOXF	0.958	2315	511
V$IRXF	0.967	414	165
V$MYT1	0.972	1144	459
V$FAST	0.977	400	274
V$PBXC	0.977	377	282
V$HAND	0.979	1227	517
O$VTBP	0.983	1617	477
V$GCNR	0.986	28	27
V$TALE	0.988	469	321
V$GATA	0.989	1160	486
V$HOXC	0.99	721	373
V$EVI1	0.992	1329	521
V$SMAD	0.992	291	232
V$TCFF	0.993	54	50
V$OCT1	0.995	2373	535
V$SRFF	0.996	670	328
V$SIXF	0.998	244	191
V$GREF	1	723	376
V$MITF	1	122	113
